# Supplementary material for: Down-regulated NEDD4L facilitates tumor progression through activating Notch signaling in lung adenocarcinoma
Source: PeerJ. 2022 May 24;10:e13402. doi: 10.7717/peerj.13402 (PMC9138047; doi:10.7717/peerj.13402)
Supplement: Supplemental Information 1 [file peerj-10-13402-s001.xlsx]

## Sheet: SupportingfigS1ab
	pcDNA control	pcDNA-NEDD4L
NEDD4L	0.13	0.65
	0.11	0.49
	0.11	0.49
β-actin	0.85	0.86
	0.84	0.84
	0.81	0.82

## Sheet: SupportingfigS1cd
	N.C	siNEDD4Ls
NEDD4L	0.38	0.1
	0.36	0.1
	0.35	0.13
β-actin	0.79	0.77
	0.78	0.79
	0.76	0.81
	0.481013	0.12987
	0.461538	0.126582
	0.460526	0.160494
