# Supplementary material for: Down-regulated NEDD4L facilitates tumor progression through activating Notch signaling in lung adenocarcinoma
Source: PeerJ. 2022 May 24;10:e13402. doi: 10.7717/peerj.13402 (PMC9138047; doi:10.7717/peerj.13402)
Supplement: Supplemental Information 2 [file peerj-10-13402-s002.xlsx]

## Sheet: Supporting figS2
Area	Aisle	CT	TM	Type	Gene	The sample name
A01	FAM	8.85	78.5	Unknown	B-actin	Control
A02	FAM	8.86	79	Unknown	B-actin	Control
A03	FAM	8.86	81	Unknown	B-actin	Control
A04	FAM	8.74	79.5	Unknown	B-actin	Control
A05	FAM	8.75	81.5	Unknown	B-actin	Control
A06	FAM	8.76	78	Unknown	B-actin	Control
A07	FAM	8.68	81.5	Unknown	B-actin	Control
A08	FAM	8.69	80	Unknown	B-actin	Control
A09	FAM	8.67	82	Unknown	B-actin	Control
A10	FAM	8.56	79.5	Unknown	B-actin	NEDD4L
A11	FAM	8.55	81	Unknown	B-actin	NEDD4L
A12	FAM	8.57	78.5	Unknown	B-actin	NEDD4L
B01	FAM	8.49	79.5	Unknown	B-actin	NEDD4L
B02	FAM	8.47	79	Unknown	B-actin	NEDD4L
B03	FAM	8.48	81	Unknown	B-actin	NEDD4L
B04	FAM	8.36	82	Unknown	B-actin	NEDD4L
B05	FAM	8.34	81.5	Unknown	B-actin	NEDD4L
B06	FAM	8.35	79	Unknown	B-actin	NEDD4L
B07	FAM	18.34	79.5	Unknown	NOTCH1	Control
B08	FAM	18.36	78.5	Unknown	NOTCH1	Control
B09	FAM	18.35	81	Unknown	NOTCH1	Control
B10	FAM	18.37	81.5	Unknown	NOTCH1	Control
B11	FAM	18.38	79.5	Unknown	NOTCH1	Control
B12	FAM	18.36	80	Unknown	NOTCH1	Control
C01	FAM	18.38	81	Unknown	NOTCH1	Control
C02	FAM	18.38	82	Unknown	NOTCH1	Control
C03	FAM	18.37	81.5	Unknown	NOTCH1	Control
C04	FAM	18.15	78.5	Unknown	NOTCH1	NEDD4L
C05	FAM	18.12	79.5	Unknown	NOTCH1	NEDD4L
C06	FAM	18.14	81	Unknown	NOTCH1	NEDD4L
C07	FAM	18.2	79.5	Unknown	NOTCH1	NEDD4L
C08	FAM	18.22	81	Unknown	NOTCH1	NEDD4L
C09	FAM	18.21	81.5	Unknown	NOTCH1	NEDD4L
C10	FAM	18.09	82	Unknown	NOTCH1	NEDD4L
C11	FAM	18.08	80	Unknown	NOTCH1	NEDD4L
C12	FAM	18.1	81.5	Unknown	NOTCH1	NEDD4L
D01	FAM	19.17	78.5	Unknown	NOTCH2	Control
D02	FAM	19.14	79	Unknown	NOTCH2	Control
D03	FAM	19.15	79.5	Unknown	NOTCH2	Control
D04	FAM	19.15	79	Unknown	NOTCH2	Control
D05	FAM	19.15	81.5	Unknown	NOTCH2	Control
D06	FAM	19.17	81	Unknown	NOTCH2	Control
D07	FAM	19.15	80.5	Unknown	NOTCH2	Control
D08	FAM	19.17	81	Unknown	NOTCH2	Control
D09	FAM	19.14	79	Unknown	NOTCH2	Control
D10	FAM	18.86	81.5	Unknown	NOTCH2	NEDD4L
D11	FAM	18.84	79.5	Unknown	NOTCH2	NEDD4L
D12	FAM	18.83	82	Unknown	NOTCH2	NEDD4L
E01	FAM	18.79	81	Unknown	NOTCH2	NEDD4L
E02	FAM	18.77	80.5	Unknown	NOTCH2	NEDD4L
E03	FAM	18.8	79.5	Unknown	NOTCH2	NEDD4L
E04	FAM	18.81	78.5	Unknown	NOTCH2	NEDD4L
E05	FAM	18.82	79	Unknown	NOTCH2	NEDD4L
E06	FAM	18.82	81	Unknown	NOTCH2	NEDD4L
E07	FAM	20.04	81.5	Unknown	NOTCH3	Control
E08	FAM	20.04	82	Unknown	NOTCH3	Control
E09	FAM	20.06	78.5	Unknown	NOTCH3	Control
E10	FAM	20.05	79	Unknown	NOTCH3	Control
E11	FAM	20.06	79.5	Unknown	NOTCH3	Control
E12	FAM	20.07	81.5	Unknown	NOTCH3	Control
F01	FAM	20.04	82	Unknown	NOTCH3	Control
F02	FAM	20.06	80	Unknown	NOTCH3	Control
F03	FAM	20.05	81	Unknown	NOTCH3	Control
F04	FAM	19.92	81.5	Unknown	NOTCH3	NEDD4L
F05	FAM	19.94	79.5	Unknown	NOTCH3	NEDD4L
F06	FAM	19.93	80	Unknown	NOTCH3	NEDD4L
F07	FAM	19.69	80.5	Unknown	NOTCH3	NEDD4L
F08	FAM	19.67	78.5	Unknown	NOTCH3	NEDD4L
F09	FAM	19.7	79	Unknown	NOTCH3	NEDD4L
F10	FAM	19.73	79.5	Unknown	NOTCH3	NEDD4L
F11	FAM	19.72	81	Unknown	NOTCH3	NEDD4L
F12	FAM	19.72	81.5	Unknown	NOTCH3	NEDD4L
G01	FAM	21.26	82	Unknown	NOTCH4	Control
G02	FAM	21.25	80	Unknown	NOTCH4	Control
G03	FAM	21.25	81.5	Unknown	NOTCH4	Control
G04	FAM	21.31	78.5	Unknown	NOTCH4	Control
G05	FAM	21.29	81.5	Unknown	NOTCH4	Control
G06	FAM	21.29	80	Unknown	NOTCH4	Control
G07	FAM	21.25	78.5	Unknown	NOTCH4	Control
G08	FAM	21.27	79.5	Unknown	NOTCH4	Control
G09	FAM	21.25	81	Unknown	NOTCH4	Control
G10	FAM	20.92	81.5	Unknown	NOTCH4	NEDD4L
G11	FAM	20.9	79.5	Unknown	NOTCH4	NEDD4L
G12	FAM	20.9	79	Unknown	NOTCH4	NEDD4L
H01	FAM	20.94	79.5	Unknown	NOTCH4	NEDD4L
H02	FAM	20.95	81	Unknown	NOTCH4	NEDD4L
H03	FAM	20.94	82	Unknown	NOTCH4	NEDD4L
H04	FAM	20.86	80	Unknown	NOTCH4	NEDD4L
H05	FAM	20.86	81.5	Unknown	NOTCH4	NEDD4L
H06	FAM	20.83	79.5	Unknown	NOTCH4	NEDD4L
