# Supplementary material for: Down-regulated NEDD4L facilitates tumor progression through activating Notch signaling in lung adenocarcinoma
Source: PeerJ. 2022 May 24;10:e13402. doi: 10.7717/peerj.13402 (PMC9138047; doi:10.7717/peerj.13402)
Supplement: Supplemental Information 6 [file peerj-10-13402-s006.xlsx]

## Sheet: fig1D
	LUAD	Adjacent control
NEDD4L	0	0.16
	0.03	0.09
	0.08	1.68
	0.1	0.87
	0.16	2.47
	0.19	1.09
	0.25	1.23
	0.31	0.93
	0.38	2.68
	0.43	3.86
	0.58	0.75
	0.62	0.86
	0.69	0.2
	0.75	1.81
	0.79	2.68
	0.92	3.86
	0.98	2.69
	1.03	0.38
	1.26	1.81
	1.58	0.93
	1.97	0.85
	2.24	4.32
	2.29	3.25
	2.86	3.41
	3.16	3.67
	1.28	0.82
	1.07	1.56
											照抄

## Sheet: fig1e
Area	Aisle	CT	TM	Type	Gene	The sample name
A01	FAM	9.65	79	Unknown	B-actin	16HBE
A02	FAM	9.65	78.5	Unknown	B-actin	16HBE
A03	FAM	9.66	79.5	Unknown	B-actin	16HBE
A04	FAM	9.64	82	Unknown	B-actin	16HBE
A05	FAM	9.63	81	Unknown	B-actin	16HBE
A06	FAM	9.65	81.5	Unknown	B-actin	16HBE
A07	FAM	9.62	79.5	Unknown	B-actin	16HBE
A08	FAM	9.62	78.5	Unknown	B-actin	16HBE
A09	FAM	9.64	81.5	Unknown	B-actin	16HBE
A10	FAM	9.58	78	Unknown	B-actin	A549
A11	FAM	9.57	78.5	Unknown	B-actin	A549
A12	FAM	9.58	79.5	Unknown	B-actin	A549
B01	FAM	9.57	81	Unknown	B-actin	A549
B02	FAM	9.54	82	Unknown	B-actin	A549
B03	FAM	9.56	78.5	Unknown	B-actin	A549
B04	FAM	9.55	79.5	Unknown	B-actin	A549
B05	FAM	9.54	81	Unknown	B-actin	A549
B06	FAM	9.54	81.5	Unknown	B-actin	A549
B07	FAM	9.37	78.5	Unknown	B-actin	H1299
B08	FAM	9.4	79	Unknown	B-actin	H1299
B09	FAM	9.37	81.5	Unknown	B-actin	H1299
B10	FAM	9.38	81	Unknown	B-actin	H1299
B11	FAM	9.38	78.5	Unknown	B-actin	H1299
B12	FAM	9.36	79	Unknown	B-actin	H1299
C01	FAM	9.36	81	Unknown	B-actin	H1299
C02	FAM	9.34	79	Unknown	B-actin	H1299
C03	FAM	9.37	79.5	Unknown	B-actin	H1299
C04	FAM	9.28	78.5	Unknown	B-actin	H1975
C05	FAM	9.27	79	Unknown	B-actin	H1975
C06	FAM	9.3	81	Unknown	B-actin	H1975
C07	FAM	9.28	79.5	Unknown	B-actin	H1975
C08	FAM	9.26	81.5	Unknown	B-actin	H1975
C09	FAM	9.27	82	Unknown	B-actin	H1975
C10	FAM	9.27	78.5	Unknown	B-actin	H1975
C11	FAM	9.25	79	Unknown	B-actin	H1975
C12	FAM	9.27	79.5	Unknown	B-actin	H1975
D01	FAM	19.55	81	Unknown	NEDD4L	16HBE
D02	FAM	19.55	82	Unknown	NEDD4L	16HBE
D03	FAM	19.54	78.5	Unknown	NEDD4L	16HBE
D04	FAM	19.66	79	Unknown	NEDD4L	16HBE
D05	FAM	19.65	79.5	Unknown	NEDD4L	16HBE
D06	FAM	19.67	81.5	Unknown	NEDD4L	16HBE
D07	FAM	19.72	78.5	Unknown	NEDD4L	16HBE
D08	FAM	19.73	78	Unknown	NEDD4L	16HBE
D09	FAM	19.73	81.5	Unknown	NEDD4L	16HBE
D10	FAM	20.83	79.5	Unknown	NEDD4L	A549
D11	FAM	20.82	79	Unknown	NEDD4L	A549
D12	FAM	20.82	81.5	Unknown	NEDD4L	A549
E01	FAM	20.73	78.5	Unknown	NEDD4L	A549
E02	FAM	20.74	79	Unknown	NEDD4L	A549
E03	FAM	20.76	81	Unknown	NEDD4L	A549
E04	FAM	20.97	81.5	Unknown	NEDD4L	A549
E05	FAM	20.98	78.5	Unknown	NEDD4L	A549
E06	FAM	20.99	80	Unknown	NEDD4L	A549
E07	FAM	19.98	81.5	Unknown	NEDD4L	H1299
E08	FAM	19.96	78.5	Unknown	NEDD4L	H1299
E09	FAM	19.97	79	Unknown	NEDD4L	H1299
E10	FAM	19.82	79.5	Unknown	NEDD4L	H1299
E11	FAM	19.84	79	Unknown	NEDD4L	H1299
E12	FAM	19.82	81.5	Unknown	NEDD4L	H1299
F01	FAM	20.04	82	Unknown	NEDD4L	H1299
F02	FAM	20.02	79.5	Unknown	NEDD4L	H1299
F03	FAM	20.01	81	Unknown	NEDD4L	H1299
F04	FAM	20	78.5	Unknown	NEDD4L	H1975
F05	FAM	20.02	79	Unknown	NEDD4L	H1975
F06	FAM	20	81.5	Unknown	NEDD4L	H1975
F07	FAM	20.06	78.5	Unknown	NEDD4L	H1975
F08	FAM	20.05	79.5	Unknown	NEDD4L	H1975
F09	FAM	20.05	81.5	Unknown	NEDD4L	H1975
F10	FAM	20.17	81	Unknown	NEDD4L	H1975
F11	FAM	20.19	78.5	Unknown	NEDD4L	H1975
F12	FAM	20.19	82	Unknown	NEDD4L	H1975
