# Supplementary material for: Down-regulated NEDD4L facilitates tumor progression through activating Notch signaling in lung adenocarcinoma
Source: PeerJ. 2022 May 24;10:e13402. doi: 10.7717/peerj.13402 (PMC9138047; doi:10.7717/peerj.13402)
Supplement: Supplemental Information 7 [file peerj-10-13402-s007.xlsx]

## Sheet: fig2A
		Control	NEDD4L
0h	cell viability	0.37	0.35
		0.34	0.3
		0.3	0.37
	Mean	0.336667	0.34
	SD	0.0351188	0.0360555
		Control	NEDD4L
24h	cell viability	0.38	0.42
		0.4	0.36
		0.43	0.39
	Mean	0.403333	0.39
	SD	0.0251661	0.03
		Control	NEDD4L
48h	cell viability	0.51	0.43
		0.54	0.48
		0.56	0.43
	Mean	0.536667	0.446667
	SD	0.0251661	0.0288675
		Control	NEDD4L
72h	cell viability	0.67	0.49
		0.69	0.55
		0.63	0.52
	Mean	0.663333	0.52
	SD	0.0305505	0.03

## Sheet: fig2C
		N.C	siNEDD4Ls
0h	cell viability	0.22	0.2
		0.25	0.24
		0.22	0.24
	Mean	0.23	0.226667
	SD	0.0173205	0.023094
		N.C	siNEDD4Ls
24h	cell viability	0.26	0.24
		0.24	0.29
		0.27	0.3
	Mean	0.256667	0.276667
	SD	0.0152753	0.0321455
		N.C	siNEDD4Ls
48h	cell viability	0.36	0.44
		0.35	0.42
		0.32	0.39
	Mean	0.343333	0.416667
	SD	0.0208167	0.0251661
		N.C	siNEDD4Ls
72h	cell viability	0.42	0.56
		0.47	0.56
		0.41	0.51
	Mean	0.433333	0.543333
	SD	0.0321455	0.0288675

## Sheet: fig2F
		A549/Control	A549/NEDD4L
0d	cell viability	0	0
		0	0
		0	0
	Mean	0	0
	SD	0	0
		A549/Control	A549/NEDD4L
14d	cell viability	13.95	13.95
		6.6	5.39
		16.31	8.7
	Mean	12.2867	9.34667
	SD	5.06419	4.31648
		A549/Control	A549/NEDD4L
21d	cell viability	32.32	24.99
		14.61	14
		19.56	13.56
	Mean	22.1633	17.5167
	SD	9.13751	6.47583
		A549/Control	A549/NEDD4L
28d	cell viability	58.98	34.74
		43.22	23
		45.78	17.66
	Mean	49.3267	25.1333
	SD	8.45745	8.73756
		A549/Control	A549/NEDD4L
35d	cell viability	81.42	54.61
		62.74	42
		71.52	42.08
	Mean	71.8933	46.23
	SD	9.34559	7.2574
		A549/Control	A549/NEDD4L
45d	cell viability	122.52	77.63
		104.19	62.12
		111.11	65.22
	Mean	112.607	68.3233
	SD	9.2562	8.2075
