# Supplementary material for: Down-regulated NEDD4L facilitates tumor progression through activating Notch signaling in lung adenocarcinoma
Source: PeerJ. 2022 May 24;10:e13402. doi: 10.7717/peerj.13402 (PMC9138047; doi:10.7717/peerj.13402)
Supplement: Supplemental Information 8 [file peerj-10-13402-s008.xlsx]

## Sheet: fig3AB(4)
	Control	NEDD4L
NOTCH1	0.31	0.26
	0.33	0.31
	0.29	0.21
NOTCH2	0.21	0.12
	0.23	0.16
	0.24	0.18
NOTCH3	0.17	0.17
	0.15	0.14
	0.16	0.14
NOTCH4	0.17	0.17
	0.15	0.16
	0.13	0.11
β-actin	0.79	0.79
	0.78	0.8
	0.81	0.82

## Sheet: fig3DE
	NEDD4L				Control
	0	2	4	8	0	2	4	8
Notch2	0.45	0.23	0.16	0.11	0.51	0.36	0.38	0.28
	0.43	0.26	0.2	0.1	0.48	0.42	0.37	0.33
	0.41	0.28	0.13	0.13	0.53	0.47	0.46	0.29
β-actin	0.82	0.79	0.81	0.82	0.81	0.79	0.81	0.84
	0.83	0.78	0.79	0.81	0.78	0.81	0.85	0.82
	0.79	0.76	0.78	0.79	0.79	0.76	0.83	0.81
