# Supplementary material for: Down-regulated NEDD4L facilitates tumor progression through activating Notch signaling in lung adenocarcinoma
Source: PeerJ. 2022 May 24;10:e13402. doi: 10.7717/peerj.13402 (PMC9138047; doi:10.7717/peerj.13402)
Supplement: Supplemental Information 10 [file peerj-10-13402-s010.xlsx]

## Sheet: fig5A
		N.C	siNEDD4Ls	siNEDD4Ls+RO4929097
0h	cell viability	0.19	0.23	0.21
		0.21	0.21	0.21
		0.24	0.19	0.22
	Mean	0.213333	0.21	0.213333
	SD	0.0251661	0.02	0.0057735
		N.C	siNEDD4Ls	siNEDD4Ls+RO4929097
24h	cell viability	0.22	0.23	0.23
		0.26	0.27	0.26
		0.22	0.24	0.23
	Mean	0.233333	0.246667	0.24
	SD	0.023094	0.0208167	0.0173205
		N.C	siNEDD4Ls	siNEDD4Ls+RO4929097
48h	cell viability	0.34	0.41	0.34
		0.31	0.42	0.36
		0.31	0.39	0.31
	Mean	0.32	0.406667	0.336667
	SD	0.0173205	0.0152753	0.0251661
		N.C	siNEDD4Ls	siNEDD4Ls+RO4929097
72h	cell viability	0.36	0.51	0.45
		0.39	0.54	0.44
		0.39	0.54	0.41
	Mean	0.38	0.53	0.433333
	SD	0.0173205	0.0173205	0.0208167

## Sheet: fig5B
		N.C	siNEDD4Ls	siNEDD4Ls+RO4929097
0h	cell viability	0.26	0.26	0.31
		0.3	0.28	0.28
		0.29	0.29	0.26
	Mean	0.283333	0.276667	0.283333
	SD	0.0208167	0.0152753	0.0251661
		N.C	siNEDD4Ls	siNEDD4Ls+RO4929097
24h	cell viability	0.35	0.36	0.31
		0.29	0.31	0.31
		0.3	0.36	0.35
	Mean	0.313333	0.343333	0.323333
	SD	0.0321455	0.0288675	0.023094
		N.C	siNEDD4Ls	siNEDD4Ls+RO4929097
48h	cell viability	0.41	0.45	0.4
		0.35	0.42	0.43
		0.37	0.48	0.43
	Mean	0.376667	0.45	0.42
	SD	0.0305505	0.03	0.0173205
		N.C	siNEDD4Ls	siNEDD4Ls+RO4929097
72h	cell viability	0.44	0.55	0.49
		0.48	0.61	0.46
		0.43	0.6	0.52
	Mean	0.45	0.586667	0.49
	SD	0.0264575	0.0321455	0.03
